# Supplementary material for: Exploring the Impact of α-Amylase Enzyme Activity and pH on Flavor Perception of Alcoholic Drinks
Source: MDPI journal article supplement (doi:10.3390/foods12051018), 2023-02-27
Supplement: s1 [file s1]

**Table S2.** Concentrations and pH [mean (M)  $\pm$  standard deviation (SD)] of solutions used to determine sensory thresholds of acid taste attribute.

| Acids Concentrations |                                                            | pH (M $\pm$ SD)                                        |                                                        |                                                          |  |
|----------------------|------------------------------------------------------------|--------------------------------------------------------|--------------------------------------------------------|----------------------------------------------------------|--|
| (g/L)                | Malic acid<br>C <sub>4</sub> H <sub>6</sub> O <sub>5</sub> | Citric<br>C <sub>6</sub> H <sub>8</sub> O <sub>7</sub> | Lactic<br>C <sub>3</sub> H <sub>6</sub> O <sub>3</sub> | Succinic<br>C <sub>4</sub> H <sub>6</sub> O <sub>4</sub> |  |
| 0.0                  | 5.47 $\pm$ 0.021                                           | 5.47 $\pm$ 0.021                                       | 5.47 $\pm$ 0.021                                       | 5.47 $\pm$ 0.021                                         |  |
| 0.2                  | 3.25 $\pm$ 0.004                                           | 3.16 $\pm$ 0.006                                       | 3.29 $\pm$ 0.002                                       | 3.51 $\pm$ 0.001                                         |  |
| 0.5                  | 2.98 $\pm$ 0.000                                           | 2.93 $\pm$ 0.004                                       | 3.18 $\pm$ 0.005                                       | 3.31 $\pm$ 0.006                                         |  |
| 0.8                  | 2.83 $\pm$ 0.003                                           | 2.42 $\pm$ 0.001                                       | 2.81 $\pm$ 0.004                                       | 3.17 $\pm$ 0.004                                         |  |
| 1.0                  | 2.78 $\pm$ 0.007                                           | 2.88 $\pm$ 0.003                                       | 2.80 $\pm$ 0.000                                       | 3.10 $\pm$ 0.004                                         |  |
| 1.2                  | 2.79 $\pm$ 0.014                                           | 2.75 $\pm$ 0.008                                       | 2.74 $\pm$ 0.001                                       | 3.05 $\pm$ 0.001                                         |  |
| 1.5                  | 2.69 $\pm$ 0.003                                           | 2.68 $\pm$ 0.011                                       | 2.74 $\pm$ 0.001                                       | 3.01 $\pm$ 0.002                                         |  |
