# Supplementary material for: Exploring the Impact of α-Amylase Enzyme Activity and pH on Flavor Perception of Alcoholic Drinks
Source: MDPI journal article supplement (doi:10.3390/foods12051018), 2023-02-27
Supplement: s1 [file s1]

**Table S3.** Concentrations and pH [mean (M)  $\pm$  standard deviation (SD)] of 12% (v/v) hydroalcoholic solutions used to determine sensory thresholds of taste attribute sweet, bitter, and astringency sensation.

| Taste attribute             | Representative Substance                                   | Concentration (g/L) | pH (M $\pm$ SD)  |
|-----------------------------|------------------------------------------------------------|---------------------|------------------|
| Sweet                       | Sucrose<br>C <sub>12</sub> H <sub>22</sub> O <sub>11</sub> | 0.0                 | 5.59 $\pm$ 0.035 |
|                             |                                                            | 2.5                 | 5.96 $\pm$ 0.001 |
|                             |                                                            | 5.0                 | 5.99 $\pm$ 0.005 |
|                             |                                                            | 7.5                 | 5.96 $\pm$ 0.001 |
|                             |                                                            | 10.0                | 5.44 $\pm$ 0.005 |
|                             |                                                            | 13.0                | 5.36 $\pm$ 0.004 |
|                             |                                                            | 20.0                | 5.87 $\pm$ 0.003 |
| Bitter   Astringency<br>g/L | Tannin                                                     | 0.0                 | 5.59 $\pm$ 0.035 |
|                             |                                                            | 0.5                 | 3.52 $\pm$ 0.001 |
|                             |                                                            | 1.0                 | 3.51 $\pm$ 0.004 |
|                             |                                                            | 2.5                 | 3.36 $\pm$ 0.004 |
|                             |                                                            | 4.0                 | 3.25 $\pm$ 0.004 |
|                             |                                                            | 5.0                 | 3.19 $\pm$ 0.004 |
|                             |                                                            | 6.0                 | 3.14 $\pm$ 0.004 |
