# Supplementary material for: Exploring the Impact of α-Amylase Enzyme Activity and pH on Flavor Perception of Alcoholic Drinks
Source: MDPI journal article supplement (doi:10.3390/foods12051018), 2023-02-27
Supplement: s1 [file s1]

**Table S1.** Concentrations and pH [mean (M)  $\pm$  standard deviation (SD)] of solutions used to determine sensory thresholds of taste attribute sweet, salty, bitter, and astringency sensation.

| Taste attribute             | Representative substance                   | Concentration | pH (M $\pm$ SD)  |
|-----------------------------|--------------------------------------------|---------------|------------------|
| Sweet<br>g/L                | Sucrose<br><chem>C12H22O11</chem>          | 0.0           | 5.47 $\pm$ 0.021 |
|                             |                                            | 2.5           | 5.74 $\pm$ 0.005 |
|                             |                                            | 5.0           | 5.68 $\pm$ 0.003 |
|                             |                                            | 7.5           | 5.76 $\pm$ 0.004 |
|                             |                                            | 10.0          | 5.74 $\pm$ 0.004 |
|                             |                                            | 13.0          | 5.72 $\pm$ 0.000 |
|                             |                                            | 20.0          | 5.78 $\pm$ 0.002 |
| Salty<br>g/L                | Sodium Chloride<br><chem>NaCl</chem>       | 0.0           | 5.47 $\pm$ 0.021 |
|                             |                                            | 0.25          | 3.81 $\pm$ 0.002 |
|                             |                                            | 0.5           | 4.82 $\pm$ 0.002 |
|                             |                                            | 1.0           | 5.60 $\pm$ 0.006 |
|                             |                                            | 2.5           | 5.60 $\pm$ 0.005 |
|                             |                                            | 4.0           | 5.24 $\pm$ 0.003 |
|                             |                                            | 6.0           | 4.62 $\pm$ 0.003 |
| Bitter<br>mg/L              | Quinine Sulfate<br><chem>C20H24N2O2</chem> | 0.0           | 5.47 $\pm$ 0.021 |
|                             |                                            | 0.5           | 5.93 $\pm$ 0.001 |
|                             |                                            | 1.0           | 5.99 $\pm$ 0.006 |
|                             |                                            | 2.5           | 5.46 $\pm$ 0.001 |
|                             |                                            | 5.0           | 5.19 $\pm$ 0.001 |
|                             |                                            | 7.5           | 5.25 $\pm$ 0.001 |
|                             |                                            | 10.0          | 5.28 $\pm$ 0.002 |
| Bitter   Astringency<br>g/L | Tannin                                     | 0.0           | 5.47 $\pm$ 0.021 |
|                             |                                            | 0.5           | 3.75 $\pm$ 0.004 |
|                             |                                            | 1.0           | 3.49 $\pm$ 0.005 |
|                             |                                            | 2.5           | 3.27 $\pm$ 0.006 |
|                             |                                            | 4.0           | 3.14 $\pm$ 0.013 |
|                             |                                            | 5.0           | 3.09 $\pm$ 0.004 |
|                             |                                            | 6.0           | 3.03 $\pm$ 0.004 |
