# Supplementary material for: Exploring the Impact of α-Amylase Enzyme Activity and pH on Flavor Perception of Alcoholic Drinks
Source: MDPI journal article supplement (doi:10.3390/foods12051018), 2023-02-27
Supplement: s1 [file s1]

**Table S4.** Concentrations and pH [mean (M)  $\pm$  standard deviation (SD)] of 12% (v/v) hydroalcoholic solutions used to determine sensory thresholds of basic acid taste attributes.

| Acids Concentrations |                                                        | pH (M± SD)                                             |                                                          |  |
|----------------------|--------------------------------------------------------|--------------------------------------------------------|----------------------------------------------------------|--|
| (g/L)                | Citric<br>C <sub>6</sub> H <sub>8</sub> O <sub>7</sub> | Lactic<br>C <sub>3</sub> H <sub>6</sub> O <sub>3</sub> | Succinic<br>C <sub>4</sub> H <sub>6</sub> O <sub>4</sub> |  |
| 0.0                  | 5.59 ± 0.035                                           | 5.59 ± 0.035                                           | 5.59 ± 0.035                                             |  |
| 0.2                  | 3.26 ± 0.003                                           | 3.36 ± 0.006                                           | 3.59 ± 0.004                                             |  |
| 0.5                  | 3.13 ± 0.003                                           | 3.01 ± 0.005                                           | 3.34 ± 0.003                                             |  |
| 0.8                  | 2.83 ± 0.005                                           | 2.90 ± 0.004                                           | 3.22 ± 0.003                                             |  |
| 1.0                  | 2.78 ± 0.004                                           | 2.84 ± 0.003                                           | 3.16 ± 0.002                                             |  |
| 1.2                  | 2.71 ± 0.004                                           | 2.79 ± 0.003                                           | 3.12 ± 0.002                                             |  |
| 1.5                  | 2.67 ± 0.001                                           | 2.77 ± 0.001                                           | 3.07 ± 0.000                                             |  |
