# Supplementary material for: Exploring the Impact of α-Amylase Enzyme Activity and pH on Flavor Perception of Alcoholic Drinks
Source: MDPI journal article supplement (doi:10.3390/foods12051018), 2023-02-27
Supplement: s1 [file s1]

**Table S5.** Composition of the lipase and  $\alpha$ -amylase enzyme kits.

| Type of Kit                                                     | Components                                                     | Amount                  |
|-----------------------------------------------------------------|----------------------------------------------------------------|-------------------------|
| <b>Lipase</b><br>(Abnova, Taipé, Taiwan)                        | Assay Buffer – pH 8.5                                          | 15 mL                   |
|                                                                 | Color reagent – DTNB<br>[5,5-dithio-bis-(2-nitrobenzoic acid)] | 530 mg                  |
|                                                                 | BALB Reagent<br>(dimercaptopropanol tributyrates)              | 1.0 mL                  |
|                                                                 | Calibrator                                                     | 2.0 mL                  |
|                                                                 |                                                                | (equivalent to 735 U/L) |
| <b><math>\alpha</math>-Amylase</b><br>(Biovision, Milpitas, US) | Assay Buffer                                                   | 55 mL                   |
|                                                                 | Substrate Mixing                                               | 5 mL                    |
|                                                                 | Amylase positive control<br>(lyophilized)                      | 1 vial                  |
|                                                                 | Nitrophenol Standard (2nM)                                     | 150 $\mu$ L             |
