# Supplementary material for: Exploring the Impact of α-Amylase Enzyme Activity and pH on Flavor Perception of Alcoholic Drinks
Source: MDPI journal article supplement (doi:10.3390/foods12051018), 2023-02-27
Supplement: s1 [file s1]

**Table S6.** Descriptors analyzed in the Descriptive Analysis (DA) sensory test of Panel one (P1) for each of the beverages beer, wines and brandies. Descriptive Analysis (DA) sensory test of Panel two (P2) for red wine and Port Wine. V.a - Visual appearance; A- Aroma; T-Taste/Texture; F - Flavor (retro nasal).

| Panel one (P1)                                                                                                                                                                    |                                                                                                                                                                                       |                                                                                                                                                    | Panel two (P2)                                                                                                                                                                                       |                                                                                                                                                          |
|-----------------------------------------------------------------------------------------------------------------------------------------------------------------------------------|---------------------------------------------------------------------------------------------------------------------------------------------------------------------------------------|----------------------------------------------------------------------------------------------------------------------------------------------------|------------------------------------------------------------------------------------------------------------------------------------------------------------------------------------------------------|----------------------------------------------------------------------------------------------------------------------------------------------------------|
| Beer                                                                                                                                                                              | Wines                                                                                                                                                                                 | Brandies                                                                                                                                           | Red wine                                                                                                                                                                                             | Port Wine                                                                                                                                                |
| V.a - foaming<br>V.a - foam<br>color                                                                                                                                              | V.a - clarity                                                                                                                                                                         | V.a - clarity                                                                                                                                      | Va - clarity<br>Va - brilliant<br>Va - dark<br>Va - intensity<br>Va - persistent tear<br>Va - clearness<br>Va – opaque                                                                               | V.a - brownish<br>V.a - orange<br>V.a - brilliant<br>V.a - persistent<br>tear<br>V.a - clearness                                                         |
| A - citrus fruit<br>A - dry fruits<br>A - floral<br>A - vegetable<br>/herbaceous<br>A -<br>woody/roasted<br>A - malt                                                              | A - citrus fruit<br>A - tree fruit<br>A - tree fruit<br>A - red fruit<br>A - black fruit<br>A - dry fruits<br>A - floral<br>A - vegetable<br>/herbaceous<br>A - spices<br>A - mineral | A -alcohol<br>A - fruity<br>A - vegetable/<br>herbaceous<br>A - spices/wood<br>A - roasted/burnt<br>A - smoke/ash<br>A - ethyl acetate/<br>varnish | A - plum<br>A - blackberries<br>A - floral<br>A - young fruit<br>A - ripe fruit<br>A - blackberry<br>A - wild Berries<br>A - red berries<br>A - smoked<br>A - herbaceous<br>A - reduced<br>A - brett | A - cinnamon<br>A - caramel<br>A - jam<br>A - spices<br>A - ripe fruit<br>A - dried fruit<br>A - red Berries<br>A - smoked<br>A - intensity<br>A - spicy |
| T - sweetness<br>T - acidity<br>T- bitterness<br>T - salty<br>T - creamy<br>T - sparkling<br>T - astringent<br>T - spicy<br>T -malt<br>T - body<br>T - alcohol<br>T – persistence | T – sweetness<br>T – acidity<br>T - tannin/<br>astringent<br>T – alcohol<br>T - body                                                                                                  | T – sweetness<br>T -bitterness<br>T – soft<br>T – burning<br>T – asperity<br>T – astringency<br>T – body<br>T - persistence                        | T - acidity<br>T - astringency<br>T - alcohol<br>T - full-bodied<br>T - balance<br>T - persistent<br>aftertaste<br>T - persistence<br>T - bitter taste<br>T - sweet taste<br>T - tannicity           | T - acidity<br>T - astringency<br>T - alcohol<br>T - ageing<br>T - persistence<br>T - bitter taste<br>T - sweet taste                                    |
| F – floral<br>F – fruity<br>F - vegetable/<br>herbaceous<br>F - spices                                                                                                            | F – floral<br>F – fruity<br>F – vegetable/<br>herbaceous<br>F - spices                                                                                                                | F – floral<br>F – fruity<br>F – vegetable/<br>herbaceous<br>F - spices                                                                             | F -wood/spices<br>F -fruity<br>F - floral<br>F - vegetable/<br>herbaceous                                                                                                                            | F - spices<br>F – dried<br>fruits<br>F - wood                                                                                                            |
